# Supplementary material
Source: HighWire-hosted journal article supplement (https://cmaj.ca/highwire/filestream/58380/field_highwire_adjunct_files/1/five-anti-appendix_2.pdf)
Supplement: five-anti-appendix_2.pdf [file five-anti-appendix_2.pdf]

**Appendix 2: References for “Managing anticoagulation and antiplatelet therapy before interventional radiology procedures”**

1. Malloy PC, Grassi CJ, Kundu S, et al.; Standards of Practice Committee with Cardiovascular and Interventional Radiological Society of Europe (CIRSE) Endorsement. Consensus guidelines for periprocedural management of coagulation status and hemostasis risk in percutaneous image-guided interventions. *J Vasc Interv Radiol* 2009;20:S240-9.
2. Heit JA. Perioperative management of the chronically anticoagulated patient. *J Thromb Thrombolysis* 2001;12:81-7.
3. O'Connor SD, Taylor AJ, Williams EC, et al. Coagulation concepts update. *AJR* 2009;193:1656-64.
4. Mannucci C, Douketis JD. The management of patients who require temporary reversal of vitamin K antagonists for surgery: a practical guide for clinicians. *Intern Emerg Med* 2006;1:96-104.
5. McVay PA, Toy PT. Lack of increased bleeding after paracentesis and thoracentesis in patients with mild coagulation abnormalities. *Transfusion* 1991;31:164-71.
